# Supplementary material for: Describing knowledge encounters in healthcare: a mixed studies systematic review and development of a classification
Source: PubMed Central journal article supplement (PMC5351057; doi:10.1186/s13012-017-0564-1), 2017-03-14
Supplement: 13012_2017_564_MOESM2_ESM.pdf [file 13012_2017_564_MOESM2_ESM.pdf]

## Additional file 2 – Included studies

| Author             | Year | Study method         | Tool type                       | Recall or real-time | Tool creator / name | Qual/Quant/Mixed | Cross-sectional/longitudinal | Country     | Setting                 | Healthcare grp                                            | n=   | MMAS quality rating (max ****) |
|--------------------|------|----------------------|---------------------------------|---------------------|---------------------|------------------|------------------------------|-------------|-------------------------|-----------------------------------------------------------|------|--------------------------------|
| <b>Al-Ghabeesh</b> | 2012 | Survey               | Questionnaire                   | Recall              | Estabrooks'         | Quantitative     | Cross                        | Jordan      | Hospital                | Nurses                                                    | 555  | **                             |
| <b>Amary-Risch</b> | 2009 | Survey               | Web-based questionnaire         | Recall              | Docstyles survey    | Quantitative     | Cross                        | USA         | Primary care + hospital | Doctors                                                   | 1500 | *                              |
| <b>Andrews</b>     | 2005 | Survey               | Mailed questionnaire            | Recall              | Author designed     | Quantitative     | Cross                        | USA         | Primary care            | physicians, nurse practitioners, and physician assistants | 59   | *                              |
| <b>Ankem</b>       | 2003 | Interviews           | Telephone interview             | Recall              | Author designed     | Mixed            | Cross                        | USA         | Hospital                | Interventional radiologists                               | 32   | **                             |
| <b>Apalayine</b>   | 1996 | Survey               | Self-administered questionnaire | Recall              | Unclear             | Quantitative     | Cross                        | Ghana       | Primary care            | Nurses and midwives                                       | 47   | **                             |
| <b>Arroll</b>      | 2002 | Observation + survey | Observation and questionnaire   | Both                | None for sources    | Quantitative     | Both                         | New Zealand | Primary care            | Doctors                                                   | 50   | ***                            |

|                        |      |            |                                             |        |                 |              |       |           |                                    |                       |      |      |
|------------------------|------|------------|---------------------------------------------|--------|-----------------|--------------|-------|-----------|------------------------------------|-----------------------|------|------|
| <b>Asefzadeh</b>       | 2008 | Survey     | Questionnaire                               | Recall | Unclear         | Quantitative | Cross | Iran      | All                                | Doctors,<br>dentists  | 339  | *    |
| <b>Barley</b>          | 2008 | Interviews | Semi-structured interviews with topic guide | Recall | N/A             | Qualitative  | Cross | England   | Hospital or primary care - unclear | Psychiatrists         | 22   | ***  |
| <b>Bennett</b>         | 2005 | Survey     | Faxed Questionnaire                         | Recall | Author designed | Quantitative | Cross | USA       | Primary care                       | Doctors               | 457  | **   |
| <b>Bennett</b>         | 2006 | Survey     | Faxed Questionnaire                         | Recall | Author designed | Quantitative | Cross | USA       | All                                | Doctors               | 2500 | ***  |
| <b>Bernard</b>         | 2012 | Survey     | Online questionnaire                        | Recall | Author designed | Quantitative | Cross | France    | Primary care                       | Doctors               | 721  | *    |
| <b>Beaulieu</b>        | 2008 | Case study | Interviews                                  | Recall | N/A             | Qualitative  | Cross | Canada    | Primary care                       | Doctors               | 22   | **** |
| <b>Bonner</b>          | 2011 | Interviews | One to one interviews                       | Recall | N/A             | Qualitative  | Cross | Australia | Hospital                           | Renal nurses          | 6    | **   |
| <b>Botello-Harbaum</b> | 2013 | Survey     | Online or printed questionnaire             | Recall | Author designed | Quantitative | Cross | USA       | Primary care                       | Dentists              | 950  | **   |
| <b>Bringsvor</b>       | 2014 | Interviews | Focus groups                                | Recall | N/A             | Qualitative  | Cross | Norway    | Hospital                           | Intensive care nurses | 20   | **** |

|                         |      |                          |                                                         |        |                 |              |       |             |                           |                        |     |      |
|-------------------------|------|--------------------------|---------------------------------------------------------|--------|-----------------|--------------|-------|-------------|---------------------------|------------------------|-----|------|
| <b>Bryant</b>           | 2004 | Interviews               | One to one<br>and group<br>interviews                   | Recall | N/A             | Qualitative  | Cross | UK          | Primary care              | Doctors                | 20  | **   |
| <b>Buckley</b>          | 2014 | Survey                   | Online<br>questionnaire                                 | Recall | Author designed | Quantitative | Cross | Australia   | Not specified             | Nurse<br>practitioners | 208 | **   |
| <b>Butzlaff</b>         | 2002 | Survey                   | Questionnaire                                           | Recall | Author designed | Quantitative | Cross | Germany     | Primary care              | Doctors                | 72  | **** |
| <b>Callen</b>           | 2008 | Survey                   | Questionnaire                                           | Recall | Author designed | Quantitative | Cross | Mongolia    | Hospital                  | Doctors                | 229 | **   |
| <b>Chang</b>            | 2009 | Survey                   | Emailed<br>questionnaire                                | Recall | Author designed | Quantitative | Cross | South Korea | Not specified             | Dentists               | 840 | *    |
| <b>Chew-<br/>Graham</b> | 2008 | Interviews               | Semi-<br>structured<br>interviews                       | Recall | N/A             | Qualitative  | Cross | UK          | Primary care              | Doctors                | 14  | ***  |
| <b>Clarke</b>           | 2002 | Case study               | Interviews,<br>focus group                              | Recall | N/A             | Qualitative  | Cross | UK          | Primary care,<br>hospital | Nurses                 | 41  | **   |
| <b>Codgill</b>          | 2003 | Survey and<br>interviews | Mailed<br>questionnaire<br>and individual<br>interviews | Recall | Author designed | Mixed        | Cross | USA         | Primary care              | Nurse<br>practitioners | 14  | **   |
| <b>Curley</b>           | 1990 | Survey                   | Questionnaire<br>s                                      | Recall | Unclear         | Quantitative | Cross | USA         | Hospital,<br>primary care | Doctors                | 228 | **   |
| <b>Dee</b>              | 1993 | Case study               | Interviews                                              | Recall | N/A             | Qualitative  | Cross | USA         | Hospital,<br>primary care | Doctors                | 12  | **   |

|                   |      |             |               |              |                          |              |              |            |               |                 |           |      |
|-------------------|------|-------------|---------------|--------------|--------------------------|--------------|--------------|------------|---------------|-----------------|-----------|------|
| <b>Elliott</b>    | 1991 | Survey      | Questionnaire | Recall       | Author designed          | Quantitative | Cross        | USA        | Not specified | Doctors         | 150       | **   |
| <b>Estabrooks</b> | 1998 | Survey      | Questionnaire | Recall       | Author designed          | Quantitative | Cross        | Canada     | Any           | Nurses          | 600       | ***  |
| <b>Estabrooks</b> | 2005 | Survey      | Questionnaire | Recall       | Author designed          | Quantitative | Cross        | Canada     | Hospitals     | Nurses          | 230       | **   |
|                   |      | b           |               |              |                          |              |              |            |               |                 |           |      |
| <b>Estabrooks</b> | 2005 | Ethnographi | Observation;  | Both         | N/A                      | Qualitative  | Both         | Canada     | Hospitals     | Nurses          | 7 units;  | **   |
|                   |      | a           | c             | interview;   |                          |              |              |            |               |                 | no info   |      |
|                   |      |             |               | card sort    |                          |              |              |            |               |                 | on        |      |
|                   |      |             |               |              |                          |              |              |            |               |                 | participa |      |
|                   |      |             |               |              |                          |              |              |            |               |                 | nts       |      |
| <b>Fairhurst</b>  | 1998 | Case study  | Interviews    | Recall       | N/A                      | Qualitative  | Cross        | UK         | Primary care  | Doctors         | 24        | ***  |
| <b>Gabbay</b>     | 2004 | Ethnographi | Interviews,   | Both         | N/A                      | Qualitative  | Longitudinal | UK         | Primary care  | Doctors,nurses, | 13        | **** |
|                   |      |             | c             | observation, |                          |              |              |            |               | phlebotomist    |           |      |
|                   |      |             |               | documentary  |                          |              |              |            |               |                 |           |      |
|                   |      |             |               | review       |                          |              |              |            |               |                 |           |      |
| <b>Gagliardi</b>  | 2008 | Survey      | Mailed        | Recall       | Author designed          | Quantitative | Cross        | Canada     | Hospital,     | Doctors         | 170       | **   |
|                   |      |             | questionnaire |              |                          |              |              |            | community     |                 |           |      |
| <b>Gavino</b>     | 2013 | Survey      | Internet and  | Recall       | Modified Olson,          | Quantitative | Cross        | Philipines | Not specified | Doctors         | 156       | *    |
|                   |      |             | paper         |              | R., James, E. &          |              |              |            |               |                 |           |      |
|                   |      |             | questionnaire |              | Fontelo, P. <sup>1</sup> |              |              |            |               |                 |           |      |

<sup>1</sup> Information Access Trends Among Clinicians at a Community Hospital in Northeast Georgia. AMIA 2010 Symposium Proceedings [Internet]. 2010 [cited 2011 August 2]. pp. 1198. Accessible at: <http://proceedings.amia.org/120up3/1?highlightText=olson%20fontelo&>

|                               |      |                                 |                                             |        |                                                                                                                  |              |              |        |                            |                 |      |      |
|-------------------------------|------|---------------------------------|---------------------------------------------|--------|------------------------------------------------------------------------------------------------------------------|--------------|--------------|--------|----------------------------|-----------------|------|------|
| <b>Gerrish</b>                | 2008 | Survey                          | Questionnaire                               | Recall | Developing<br>Evidence-Based<br>Practice (DEBP)<br>Questionnaire -<br>Sources section<br>based on<br>Estabrooks' | Quantitative | Cross        | UK     | Hospital                   | Nurses          | 598  | **   |
| <b>Gonzalez-<br/>Gonzalez</b> | 2007 | Observation<br>and<br>interview | Video and<br>interview                      | Both   | N/A                                                                                                              | Quantitative | Longitudinal | Spain  | Primary care               | Doctors         | 112  | **   |
| <b>Gravois</b>                | 1995 | Survey                          | Questionnaire                               | Recall | Author designed                                                                                                  | Quantitative | Cross        | USA    | Various                    | Hygienists      | 44   | **   |
| <b>Jackson</b>                | 2007 | Survey                          | Postal<br>Questionnaire                     | Recall | Author designed                                                                                                  | Quantitative | Cross        | UK     | Primary care +<br>hospital | Doctors, nurses | 54   | **   |
| <b>James</b>                  | 2010 | Ethnograph<br>y                 | Observation,<br>interviews,<br>conversation | Both   | N/A                                                                                                              | Qualitative  | Longitudinal | Sweden | Hospital                   | Nurses          | 25   | **** |
| <b>Kosteniuk</b>              | 2006 | Survey                          | Questionnaire                               | Recall | Author designed                                                                                                  | Quantitative | Cross        | Canada | Various                    | Nurses          | 3933 | ***  |
| <b>Kosteniuk</b>              | 2013 | Survey                          | Questionnaire                               | Recall | Author designed                                                                                                  | Quantitative | Cross        | Canada | Primary care               | Doctors         | 331  | ***  |
| <b>Martinez-<br/>Silveira</b> | 2008 | Survey                          | Questionnaire                               | Recall | Author designed                                                                                                  | Quantitative | Cross        | Brazil | Hospital                   | Doctors         | 85   | *    |
| <b>McCord</b>                 | 2007 | Survey                          | Observation                                 | Recall | N/A                                                                                                              | Quantitative | Cross        | USA    | Hospital                   | Doctors         | 25   | **   |

|                            |      |                 |                                             |        |                                                                                              |              |              |           |                              |                                        |     |      |
|----------------------------|------|-----------------|---------------------------------------------|--------|----------------------------------------------------------------------------------------------|--------------|--------------|-----------|------------------------------|----------------------------------------|-----|------|
| <b>McGettigan</b>          | 2001 | Survey          | Questionnaire                               | Recall | Unclear                                                                                      | Quantitative | Cross        | Australia | Hospital and<br>primary care | Doctors                                | 226 | **   |
| <b>McKnight</b>            | 2006 | Ethnograph<br>y | Observation,<br>interviews                  | Both   | N/A                                                                                          | Qualitative  | Longitudinal | USA       | Hospital                     | Nurses                                 | 6   | ***  |
| <b>Mills</b>               | 2009 | Survey          | Questionnaire                               | Recall | Developing<br>Evidence-based<br>Practice<br>Questionnaire<br>(DEPQ) (Gerrish et<br>al. 2007) | Quantitative | Cross        | Australia | Primary care                 | Nurses                                 | 590 | ***  |
| <b>Nail-<br/>Chiwetalu</b> | 2007 | Survey          | Questionnaire                               | Recall | Author designed<br>based on Powell<br>CA, Case-Smith J. <sup>2</sup>                         | Quantitative | Cross        | USA       | Various                      | Speech and<br>language<br>pathologists | 208 | **   |
| <b>Neher</b>               | 2014 | Interviews      | One to one                                  | Recall | N/A                                                                                          | Qualitative  | Cross        | Sweden    | Hospital and<br>primary care | Rheumatology<br>nurses                 | 12  | ***  |
| <b>Nichols</b>             | 2008 | Ethnograph<br>y | Observation<br>and interview                | Recall | N/A                                                                                          | Qualitative  | Cross        | UK        | Hospital                     | Doctors, nurses                        | 14  | **** |
| <b>Nieri</b>               | 2008 | Survey          | Questionnaire<br>via telephone<br>interview | Recall | Unclear but<br>suspect author<br>designed                                                    | Quantitative | Cross        | Italy     | Primary care                 | Dentists                               | 123 | ***  |

<sup>2</sup> Information literacy skills of occupational therapy graduates: a survey of learning outcomes. J Med Libr Assoc 2003 Oct;91(4):468–77.

|                 |      |                                   |                              |        |                                           |              |       |           |                             |             |                                       |     |
|-----------------|------|-----------------------------------|------------------------------|--------|-------------------------------------------|--------------|-------|-----------|-----------------------------|-------------|---------------------------------------|-----|
| <b>Norbert</b>  | 2013 | Survey                            | Questionnaire                | Recall | Unclear but<br>suspect author<br>designed | Quantitative | Cross | Tanzania  | Hospital                    | Doctors     | 215                                   | *   |
| <b>Northup</b>  | 1983 | Critical<br>incident<br>technique | Telephone<br>interview       | Recall | Author designed                           | Quantitative | Cross | USA       | Varios                      | Doctors     | 293                                   | *** |
| <b>Nylenna</b>  | 2000 | Survey                            | Postal<br>Questionnaire      | Recall | Unclear                                   | Quantitative | Cross | Norway    | Primary car<br>and hospital | Doctors     | 1276                                  | **  |
| <b>O'Leary</b>  | 2012 | Interviews,<br>Survey             | Interviews,<br>questionnaire | Recall | Author designed                           | Mixed        | Cross | Ireland   | Various                     | Nurses      | 29<br>interview<br>w<br>377<br>survey | *** |
| <b>Oliveri</b>  | 2004 | Survey                            | Questionnaire                | Recall | Unclear but<br>suspect author<br>designed | Quantitative | Cross | Denmark   | Hospital                    | Doctors     | 226                                   | *   |
| <b>Ozsoy</b>    | 2008 | Survey                            | Questionnaire                | Recall | Estabrooks'                               | Quantitative | Cross | Turkey    | Hospital                    | Nurses      | 498                                   | **  |
| <b>Papp</b>     | 2002 | Survey                            | Questionnaire                | Recall | Author designed                           | Quantitative | Cross | USA       | Primary care                | Doctors     | 105                                   | *   |
| <b>Peay</b>     | 1984 | Survey                            | Interviews                   | Recall | N/A                                       | Quantitative | Cross | Australia | Primary care                | Doctors     | 124                                   | *   |
| <b>Pelzer</b>   | 1991 | Survey                            | Questionnaire                | Recall | Author designed                           | Quantitative | Cross | USA       | Primary care                | Vets        | 287                                   | **  |
| <b>Perzeski</b> | 2012 | Survey                            | Questionnaire<br>(web)       | Recall | Author designed                           | Quantitative | Cross | USA       | Various                     | Podiatrists | 143                                   | *   |

|                  |      |                              |                              |           |                                                                                     |              |              |           |                            |                                       |     |     |
|------------------|------|------------------------------|------------------------------|-----------|-------------------------------------------------------------------------------------|--------------|--------------|-----------|----------------------------|---------------------------------------|-----|-----|
| <b>Ramos</b>     | 2003 | Observation                  | Observation                  | Real-time | N/A                                                                                 | Quantitative | Longitudinal | USA       | Primary care               | Doctors                               | 38  | *   |
| <b>Rappolt</b>   | 2002 | Ethnography<br>y             | Interviews                   | Recall    | N/A                                                                                 | Qualitative  | Cross        | Canada    | Primary care +<br>hospital | Rehabilitation<br>therapists          | 24  | *** |
| <b>Robertson</b> | 2011 | Ethnography<br>y             | Interviews                   | Recall    | N/A                                                                                 | Qualitative  | Cross        | Australia | Primary care               | Doctors                               | 40  | *** |
| <b>Sarbaz</b>    | 2016 | Survey                       | Questionnaire                | Recall    | Author designed                                                                     | Quantitative | Cross        | Iran      | Hospital                   | Nurses                                | 131 | *   |
| <b>Secco</b>     | 2006 | Survey                       | Questionnaire                | Recall    | Nursing<br>Information Use<br>Survey (NIUS) -<br>Winnipeg<br>Childrens'<br>Hospital | Quantitative | Cross        | USA       | Hospital                   | Nurses                                | 113 | *   |
| <b>Selvi</b>     | 2002 | Survey                       | Questionnaire                | Recall    | Author designed                                                                     | Quantitative | Cross        | Turkey    | Primary care               | Dentists                              | 133 | **  |
| <b>Shelstad</b>  | 1996 | Survey                       | Questionnaire                | Recall    | Unclear but<br>suspect author<br>designed                                           | Quantitative | Cross        | USA       | Primary care +<br>hospital | Doctors                               | 99  | **  |
| <b>Sibbald</b>   | 2013 | Questionnaire,<br>Interviews | Questionnaire,<br>Interviews | Recall    | Social Network<br>Analysis<br>Questionnaire -<br>Author designed                    | Qualitative  | Cross        | Canada    | Primary care               | Nurses, doctors,<br>allied healthcare | 28  | **  |



|                          |                        |            |                                                        |        |                                     |              |       |         |                           |          |     |     |
|--------------------------|------------------------|------------|--------------------------------------------------------|--------|-------------------------------------|--------------|-------|---------|---------------------------|----------|-----|-----|
| <b>Stetler</b>           | 1991                   | Interviews | Semi-structured interviews                             | Recall | N/A                                 | Quantitative | Cross | USA     | Hospital                  | Nurses   | 24  | *   |
| <b>Straub-Morarend</b>   | 2011                   | Survey     | Questionnaire                                          | Recall | Author designed                     | Quantitative | Cross | USA     | Primary care              | Dentists | 518 | *   |
| <b>Strother</b>          | 1986                   | Survey     | Questionnaire                                          | Recall | Author designed                     | Quantitative | Cross | USA     | Primary care + hospital   | Dentists | 344 | **  |
| <b>Tabatabaei-Malazy</b> | 2012                   | Survey     | Questionnaire                                          | Recall | Author designed                     | Quantitative | Cross | Iran    | Any                       | Doctors  | 319 | **  |
| <b>Thompson</b>          | 2001<br>a<br>2001<br>b | Case study | Observation, interviews, document analysis, Q analysis | Both   | N/A                                 | Qualitative  | Both  | UK      | Hospital                  | Nurses   | 108 | *** |
| <b>Timpka</b>            | 1989                   | Survey     | Questionnaire                                          | Recall | Author designed                     | Quantitative | Cross | Sweden  | Primary care              | Doctors  | 186 | **  |
| <b>Urquhart</b>          | 1994                   | Vignettes  | Vignettes                                              | Recall | N/A                                 | Qualitative  | Cross | UK      | Hospital and primary care | Nurses   | 64  | *** |
| <b>Vollmar</b>           | 2009                   | Survey     | Questionnaire                                          | Recall | Unclear but suspect author designed | Quantitative | Cross | Germany | Primary care              | Doctors  | 264 | **  |

|                             |      |                                |                                                                             |        |                                                                                                 |              |       |         |                           |                                                                            |                                                     |     |
|-----------------------------|------|--------------------------------|-----------------------------------------------------------------------------|--------|-------------------------------------------------------------------------------------------------|--------------|-------|---------|---------------------------|----------------------------------------------------------------------------|-----------------------------------------------------|-----|
| <b>Wardh</b>                | 2009 | Survey,<br>interviews          | Postal<br>Questionnaire<br>Focus group<br>Interviews                        | Recall | <u>Unclear but<br/>suggests author<br/>designed Unclear<br/>but suspect<br/>author designed</u> | Mixed        | Cross | Sweden  | Primary care;<br>hospital | Dentists                                                                   | Questionnaire:<br>177. In<br>focus<br>groups:<br>15 | **  |
| <b>Warren-<br/>Findlow</b>  | 2010 | Focus<br>groups,<br>interviews | Focus groups,<br>interviews                                                 | Recall | N/A                                                                                             | Qualitative  | Cross | USA     | Primary care              | Doctors, nurses,<br>doctors'<br>assistants                                 | 49                                                  | **  |
| <b>Weng</b>                 | 2013 | Survey                         | Questionnaire                                                               | Recall | Author designed                                                                                 | Quantitative | Cross | Taiwan  | Hospital                  | Doctors, nurses,<br>pharmacists,<br>physical<br>therapists,<br>technicians | 6160                                                | *** |
| <b>Yadav</b>                | 2012 | Survey                         | Development<br>of Evidence-<br>Based Practice<br>Questionnaire<br>(Gerrish) | Recall | Developing<br>Evidence-based<br>Practice<br>Questionnaire<br>(DEPQ) (Gerrish et<br>al. 2007)    | Quantitative | Cross | Ireland | hospital,<br>primary care | Nurses                                                                     | 145                                                 | **  |
| <b>Yousefi-<br/>Nooraie</b> | 2007 | Survey                         | Questionnaire                                                               | Recall | Unclear                                                                                         | Quantitative | Cross | Iran    | hospital                  | Doctors                                                                    | 250                                                 | *   |
