# Supplementary material for: Describing knowledge encounters in healthcare: a mixed studies systematic review and development of a classification
Source: PubMed Central journal article supplement (PMC5351057; doi:10.1186/s13012-017-0564-1), 2017-03-14
Supplement: 13012_2017_564_MOESM3_ESM.pdf [file 13012_2017_564_MOESM3_ESM.pdf]

## Additional File 3 - Information and experiences extracted from included studies

|                                                 |
|-------------------------------------------------|
| Peers / colleagues                              |
| Observation of others' practice                 |
| Formalised supervision                          |
| Systematic self-evaluation                      |
| Specialist (including consultants in hospitals) |
| Email contact with specialist                   |
| Telephone hotline to specialist                 |
| University colleagues                           |
| Informal conversation with colleagues           |
| Personal contacts                               |
| Colleagues via internet                         |
| Mentor / senior clinician                       |
| Peer opinion leaders                            |
| Specialist dentist                              |
| "Dental practice expert"                        |
| CNS/CNE                                         |
| Preceptor/resource persons                      |
| Non-medical personnel                           |
| Unit managers                                   |
| Practice development team                       |
| Students                                        |
| Teachers                                        |
| Preceptor / supervising doctor                  |
| Clinical leaders                                |
| Physicians (discussions with)                   |
| Residents                                       |
| Grand rounds                                    |
| Referral information & feedback from colleagues |
| Informal networks                               |
| Specialty groups                                |
| Allied health workers                           |
| "Other" healthcare professionals                |
| Prescribing advisors                            |
| Other organisations                             |
| Social services                                 |
| Local care delivery (arrangements)              |
| Local service evaluations                       |

|                                                                                   |
|-----------------------------------------------------------------------------------|
| Local prescribing culture                                                         |
| Pharmaceutical companies                                                          |
| Pharmaceutical companies' websites                                                |
| Pharmaceutical / product literature                                               |
| Drug company functions                                                            |
| Company reps                                                                      |
| Company literature                                                                |
| Advertising (aimed at healthcare professionals)                                   |
| Direct mail                                                                       |
| Manufacturer                                                                      |
| Drug information                                                                  |
| Package insert                                                                    |
| Medication / treatment pamphlets                                                  |
| Drug reference sources - print format                                             |
| Drug reference sources - e-format                                                 |
| Filtering services                                                                |
| Clinical calculators                                                              |
| Computer decision aid                                                             |
| Patients                                                                          |
| Patient questioning                                                               |
| Patient record                                                                    |
| Patients' experiences of illness                                                  |
| Observing patients in public space                                                |
| Patient surveys                                                                   |
| Patients' families                                                                |
| Health information service for patients                                           |
| The body - own                                                                    |
| The body - other nurses'                                                          |
| The body - patient's                                                              |
| Reading the patient using senses (smell, listening, watching, touch)              |
| Conferences / conventions / congresses                                            |
| Seminars                                                                          |
| Workshops                                                                         |
| Courses - lecture-based                                                           |
| Courses - hands-on                                                                |
| Lectures sponsored by workplace                                                   |
| Symposiums                                                                        |
| Continuing education - local                                                      |
| Continuing education - national                                                   |
| Continuing education - non-specific                                               |
| CME articles                                                                      |
| Departmental courses                                                              |
| Inservice education at work                                                       |
| Professional meetings including association meetings (national and international) |

|                                                                                    |
|------------------------------------------------------------------------------------|
| In-services                                                                        |
| Internships                                                                        |
| Orientations                                                                       |
| Rounds                                                                             |
| Meetings                                                                           |
| Journal clubs                                                                      |
| Quality circles                                                                    |
| Study club                                                                         |
| What has worked / not worked before                                                |
| Personal development of acquired knowledge through experience and prior knowledge  |
| Side-effects in patients                                                           |
| Personal clinical experience                                                       |
| Personal experience of patients' experiences of illness                            |
| Nurses' known explorations                                                         |
| Intuition                                                                          |
| Setting knowledge arising from social & clinical pressure, expectations and events |
| Patients' charts                                                                   |
| Policy & procedure manuals                                                         |
| National health policy                                                             |
| Government documents                                                               |
| Video & other media including audio tapes                                          |
| Thesis or dissertation                                                             |
| Newsletters                                                                        |
| Communication books                                                                |
| Bulletin boards                                                                    |
| Electronic resources (including CD ROM)                                            |
| Internet                                                                           |
| Computer information networks                                                      |
| Intranet                                                                           |
| Medical websites (incl. WebMD)                                                     |
| Organisational websites                                                            |
| Patient group websites e.g. dementia                                               |
| Internet - public sites                                                            |
| Internet - databases                                                               |
| Internet - search engines                                                          |
| Computer programme                                                                 |
| Computer databases                                                                 |
| Personal digital assistant                                                         |
| Medline / index medicus (offline)                                                  |
| Point of care databases                                                            |
| Chatrooms                                                                          |
| Email discussion lists                                                             |
| Email use                                                                          |
| Online continuing education                                                        |

|                                                                              |
|------------------------------------------------------------------------------|
| CD Medical textbook                                                          |
| Patient information                                                          |
| Patient-specific information via internet                                    |
| prescription / patient orders via internet                                   |
| Books, journals, previous research                                           |
| Textbooks (not grouped with other publications) including 'personal library' |
| Textbooks - electronic                                                       |
| Pocket reference / book                                                      |
| Handbooks or manuals                                                         |
| Technical reports                                                            |
| Diagnostic laboratory                                                        |
| Laboratory manual                                                            |
| Educational booklet or brochure                                              |
| Informal documents                                                           |
| Journals (not grouped with other publications) including online journals     |
| Journals - editorials                                                        |
| Summaries of studies including structured abstracts                          |
| evidence-based clinical decision support resource                            |
| Reviews                                                                      |
| Case studies                                                                 |
| Professional association updates via internet                                |
| Professional association                                                     |
| Professional association website                                             |
| Unions                                                                       |
| Professional newsletters                                                     |
| Brief updates                                                                |
| Professional organisations / societies                                       |
| External (professional) bodies                                               |
| Clinical guidelines                                                          |
| Locally developed guidelines or protocols                                    |
| Evidence-based practice                                                      |
| Professional literature                                                      |
| Non-peer reviewed dental information                                         |
| Free professional magazines                                                  |
| Public media                                                                 |
| Personal beliefs                                                             |
| Personal non-clinical experience                                             |
| Basic education (at nursing / medical / dental / vet etc. school)            |
| Common sense                                                                 |
| Training                                                                     |
| Own notes                                                                    |
| Local audit                                                                  |
| Practice or intradepartmental meetings                                       |
| Group/local norms                                                            |

|                                             |
|---------------------------------------------|
| The ways it has always been done            |
| Handover                                    |
| Chiefs / local heads                        |
| Local community                             |
| Library / Information centre                |
| Librarian                                   |
| Electronic documents (offline e.g. on disk) |
| Hospice                                     |
| Organisational features                     |
| Wall chart                                  |
