# Supplementary material for: Describing knowledge encounters in healthcare: a mixed studies systematic review and development of a classification
Source: Springer Nature journal article supplement (doi:10.1186/s13012-017-0564-1), 2017-03-14
Supplement: MOESM1 [file 12141888]

## Additional file 1 – Search strategy

OVID Medline and OVID Embase were searched together using the following strategy:

| #  | Searches                                 | Results |
|----|------------------------------------------|---------|
| 1  | (seek or seeking).mp.                    | 162033  |
| 2  | (search or searching).mp.                | 402232  |
| 3  | (utilization or utilisation).mp.         | 403017  |
| 4  | exchange.mp.                             | 476370  |
| 5  | (share or sharing).mp.                   | 228699  |
| 6  | resource\$.mp.                           | 441850  |
| 7  | source\$.mp.                             | 959411  |
| 8  | doctor\$.mp.                             | 274357  |
| 9  | (nursing or nurse\$).mp.                 | 1169812 |
| 10 | (dental or dentist\$).mp.                | 738455  |
| 11 | (veterinary or vet or vets).mp.          | 115311  |
| 12 | (podiatry or podiatrist\$).mp.           | 5685    |
| 13 | (therapy or therapist\$).mp.             | 5024767 |
| 14 | (physiotherapy or physiotherapist\$).mp. | 80958   |
| 15 | psychologist\$.mp.                       | 26774   |
| 16 | surgeon\$.mp.                            | 346420  |
| 17 | evidence.mp.                             | 2449208 |
| 18 | knowledge.mp.                            | 902214  |
| 19 | information.mp.                          | 1938096 |
| 20 | 17 or 18 or 19                           | 4886998 |
| 21 | 1 or 2 or 3 or 4 or 5 or 6 or 7          | 2840999 |

|    |                                                                                                                                                                                          |         |
|----|------------------------------------------------------------------------------------------------------------------------------------------------------------------------------------------|---------|
| 22 | 8 or 9 or 10 or 11 or 12 or 13 or 14 or 15 or 16                                                                                                                                         | 7427020 |
| 23 | ((evidence or knowledge or information) adj1 (seek or seeking or (search or searching) or (utilization or utilisation) or exchange or (share or sharing) or resource\$ or source\$)).mp. | 32705   |
| 24 | 22 and 23                                                                                                                                                                                | 8168    |
| 25 | limit 24 to english language                                                                                                                                                             | 7579    |
| 26 | limit 25 to human                                                                                                                                                                        | 6553    |

Note: mp=ti, ab, sh, hw, tn, ot, dm, mf, dv, kw, nm, kf, px, rx, ui

Subject headings (sh above) are included in the search along with keywords.
